# Supplementary material for: Scanning ion-conductance microscopy technique for studying the topography and mechanical properties of Candida parapsilosis yeast microorganisms
Source: Royal Society of Chemistry journal article supplement (doi:10.1039/d2bm00964a), 2022-11-29
Supplement: d2bm00964a1.pdf [file d2bm00964a1.pdf]

Electronic Supplementary Material (ESI) for Biomaterials Science.

This journal is © The Royal Society of Chemistry 2022

## Supporting Information

### Scanning ion-conductance microscopy technique for studying the topography and mechanical properties of *Candida parapsilosis* yeast microorganisms

Nikita Savin<sup>a</sup>, Alexander Erofeev<sup>a,b</sup>, Vasilii Kolmogorov<sup>a,b</sup>, Sergey Salikhov<sup>a</sup>, Yuri Efremov<sup>c</sup>, Peter Timashev<sup>c,d,e</sup>, Natalia Grammatikova<sup>f</sup>, Igor Levshin<sup>f</sup>, Christopher Edwards<sup>g</sup>, Yuri Korchev<sup>g</sup>, Petr Gorelkin<sup>a</sup>

- a. NUST MISiS, Moscow, Russian Federation.
- b. Lomonosov Moscow State University, Moscow, Russian Federation.
- c. Institute for Regenerative Medicine I. M. Sechenov, Moscow, Russian Federation.
- d. World-class Research Center “Digital Biodesign and Personalized Healthcare”, Moscow, Russian Federation.
- e. Chemistry department Lomonosov Moscow State University, Moscow, Russian Federation.
- f. G. F. Gauze Research Institute for New Antibiotics, Moscow, Russian Federation.
- g. Imperial College London, London, United Kingdom.

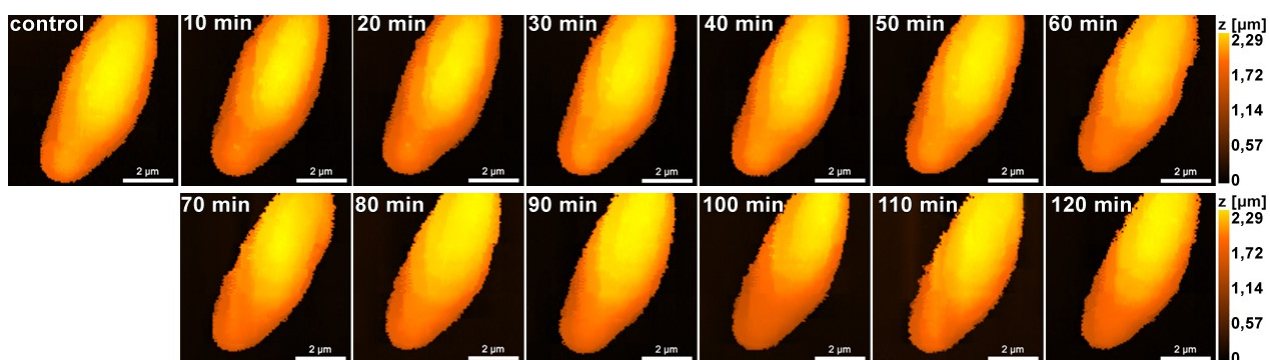

**Figure S1** SICM images of a *Candida parapsilosis* control cell on repeated scans every 10 minutes for two hours.
